# Supplementary material for: Modulation of crystal water in cobalt phosphate for promoted water oxidation
Source: Royal Society of Chemistry journal article supplement (doi:10.1039/d0cc01023e), 2020-01-01
Supplement: d0cc01023e1.pdf [file d0cc01023e1.pdf]

## Electronic Supplementary Information

### **Modulation of crystal water in cobalt phosphate for promoted water oxidation**

Jindi Qi<sup>†</sup>, Junfeng Xie<sup>†,\*</sup>, Zimeng Wei, Shanshan Lou, Pin Hao, Fengcai Lei and Bo Tang<sup>\*</sup>

College of Chemistry, Chemical Engineering and Materials Science, Key Laboratory of Molecular and Nano Probes (Ministry of Education), Collaborative Innovation Center of Functionalized Probes for Chemical Imaging in Universities of Shandong, Institute of Molecular and Nano Science, Shandong Normal University, Jinan, Shandong, 250014, P. R. China. E-mail: xiejf@sdu.edu.cn; tangb@sdu.edu.cn.

# 1. Experimental Section

## 1.1 Materials

The chemicals were purchased from Sinopharm Chemical Reagent Co., Ltd. and used as received without further purification.

## 1.2 Preparation of the $\beta$ -Co(OH)<sub>2</sub> nanosheet precursor

The synthesis of  $\beta$ -Co(OH)<sub>2</sub> nanosheets were performed in a three-neck flask. Typically, 2 mmol CoCl<sub>2</sub>·6H<sub>2</sub>O and 36 mmol hexamethylenetetramine (HMT) were added directly into 300 mL N<sub>2</sub>-purged deionized water under vigorous stirring. The reaction system was heated to 92 °C and maintained for 4 hours. Then, pink powdery product can be obtained. The product was then vacuum-filtrated over a cellulose acetate membrane with 0.22  $\mu$ m pore size, washed by deionized water for several times, and finally dried under vacuum at 40 °C for 24 hours.

## 1.3 Synthesis of cobalt phosphate with tunable contents of crystal water

Cobalt phosphate (Co-Pi) catalysts with tunable contents of crystal water were synthesized via a one-step hydrothermal method. In detail, 4 mmol KH<sub>2</sub>PO<sub>4</sub> and 0.4 mmol  $\beta$ -Co(OH)<sub>2</sub> were dispersed in 40 mL deionized water and stirred for 10 min. After sonicating for 2 min, the homogeneous dispersion was transferred into a 50 mL Teflon-lined stainless-steel autoclave, sealed and heated at 160 °C for 9 hours. Then, the as-obtained violet Co-Pi tetrahydrate (Co-Pi-4W; JCPDS card No. 34-0844) powdery product was collected by centrifugation and washed with deionized water for several times. By simply altering the synthetic conditions, Co-Pi octahydrate and Co-Pi dihydrate can be prepared. For the synthesis of Co-Pi octahydrate, lower temperature is essential, for which a hydrothermal procedure at 120 °C for 9 hours is conducted with the other experimental parameters unchanged. The as-obtained pink powdery Co-Pi octahydrate (Co-Pi-8W; JCPDS card No. 33-0432) can be collected by centrifugation and decontamination. For preparing Co-Pi dihydrate, a higher reaction temperature with longer reaction period is demanded. In brief, the reaction was proceeded at 200 °C for 10 hours. After that, fuchsia-colored Co-Pi dihydrate

(Co-Pi-2W; JCPDS card No. 80-1996) can be formed. The product was collected by centrifugation and decontamination similarly, and dried at 40 °C under vacuum for 24 hours. For the synthesis of anhydrous  $\text{Co}_3(\text{PO}_4)_2$  (Co-Pi; JCPDS card No. 77-0225), the as-obtained Co-Pi-4W was calcined in Ar atmosphere at 600 °C for 2 hours with heating/cooling rate of 5 °C/min.

#### **1.4 Structural characterizations**

X-ray diffraction (XRD) was performed on a Philips X'Pert Pro Super diffractometer with Cu  $K\alpha$  radiation ( $\lambda = 1.54178 \text{ \AA}$ ). The Fourier transform infrared (FT-IR) spectra were measured on a MAGNA-IR 750 (Nicolet Instrument Co., USA). The scanning electron microscopy (SEM) images were taken on a JEOL JSM-6700F SEM. The transmission electron microscopy (TEM) was carried out on a JEM-2100F equipment at an acceleration voltage of 200 kV. The high-resolution TEM (HRTEM) was performed on a JEOL-2010 TEM at an acceleration voltage of 200 kV. The X-ray photoelectron spectroscopy (XPS) analyses were performed on a VGESCALAB MKII X-ray photoelectron spectrometer with an excitation source of Mg  $K\alpha = 1253.6 \text{ eV}$ , and the resolution was lower than 1 atom%.

#### **1.5 Electrocatalytic study**

All the electrochemical measurements were performed in a three-electrode system linked with an electrochemical workstation (CHI660E) at room temperature. All potentials were calibrated to a reversible hydrogen electrode (RHE) and the data are presented without  $iR$  correction. Typically, 4 mg of catalyst and 40  $\mu\text{L}$  Nafion solution (Sigma Aldrich, 5 wt%) were dispersed in 1 mL water-isopropanol mixed solution (volume ratio of 3:1) by sonicating for at least 30 min to form a homogeneous ink. Then 5  $\mu\text{L}$  of the dispersion (containing 20  $\mu\text{g}$  of catalyst) was loaded onto a glassy carbon electrode with 3 mm diameter, leading to a catalyst loading of  $0.285 \text{ mg cm}^{-2}$ . The as-prepared catalyst film was allowed to be dried at room temperature. The cyclic voltammetry (CV) and linear sweep voltammetry (LSV) with a scan rate of  $5 \text{ mV s}^{-1}$  were conducted in  $\text{O}_2$ -purged 1 M KOH solution. A Hg/HgO electrode was used as the reference electrode, a platinum gauze electrode (2

cm × 2 cm, 60 mesh) was used as the counter electrode, and the glassy carbon electrodes loaded with various catalysts were served as the working electrodes. For the chronoamperometry test, a static potential of 1.7 V vs. RHE was applied. The electrochemical impedance spectroscopy (EIS) measurements were operated in the same configuration at 1.55 V vs. RHE from 10<sup>-2</sup>-10<sup>5</sup> Hz.

## 2. Possible mechanism for alkaline OER

As well accepted, four steps are involved in alkaline OER, which could be described as follows:

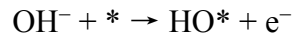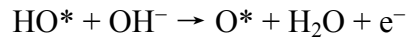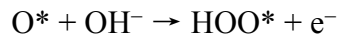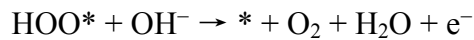

where the label \* represents the active surface sites which are usually the high-valence metal sites in transition metal compounds. For Co-based catalysts, a pre-oxidation process could occur on the surface, leading to the generation of in-situ formed high-valence Co sites as the active surface sites for alkaline OER.<sup>1</sup>

### 3. Additional physical and electrochemical characterizations

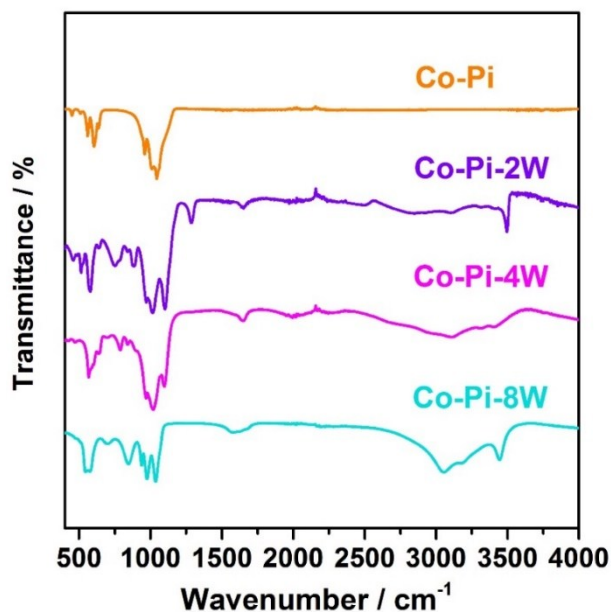

**Fig. S1** FT-IR spectra of the catalysts reveal the presence of  $\text{PO}_4^{3-}$  and crystal water in hydrated Co-Pi.

In detail, all the samples possess characteristic peaks corresponding to the cobalt phosphates with the symmetric stretching vibration of the P-O ( $900\text{-}1200\text{ cm}^{-1}$ ) and the finger peaks of the lattice vibration modes of Co-O ( $400\text{-}900\text{ cm}^{-1}$ ). For the hydrated Co-Pi samples (Co-Pi-2W, Co-Pi-4W and Co-Pi-8W), additional peaks from crystal water can be identified with the stretching vibration of O-H in the crystal water (generally appearing at  $3300\text{-}3540\text{ cm}^{-1}$ ) and the bending vibration of O-H in the crystal water ( $1600\text{-}1700\text{ cm}^{-1}$ ).<sup>2</sup> No signal of water can be detected for the anhydrous Co-Pi.

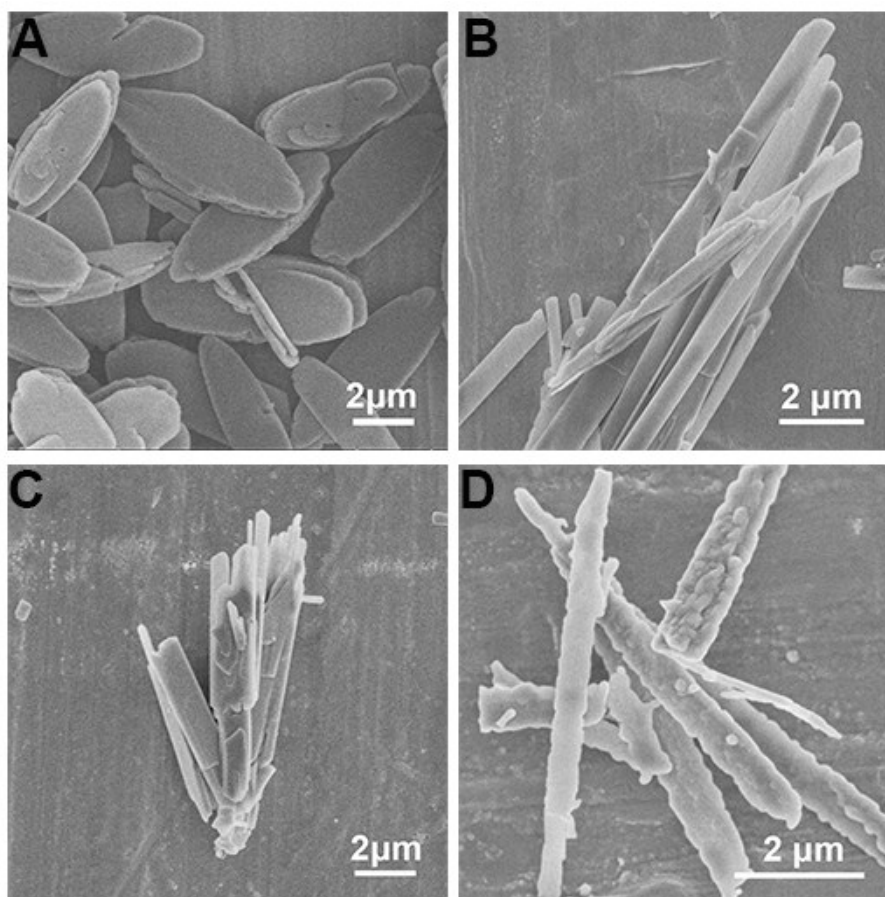

**Fig. S2** (A-D) SEM images of (A) Co-Pi-8W, (B) Co-Pi-4W, (C) Co-Pi-2W and (D) anhydrous Co-Pi.

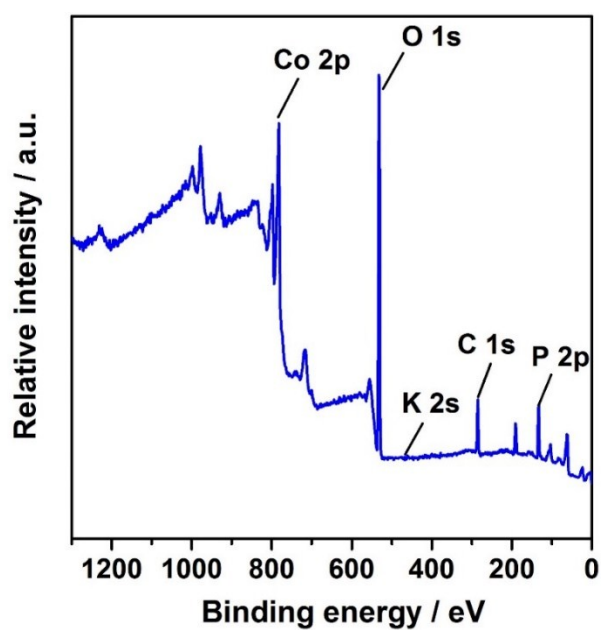

**Fig. S3** XPS survey spectrum of Co-Pi-4W.

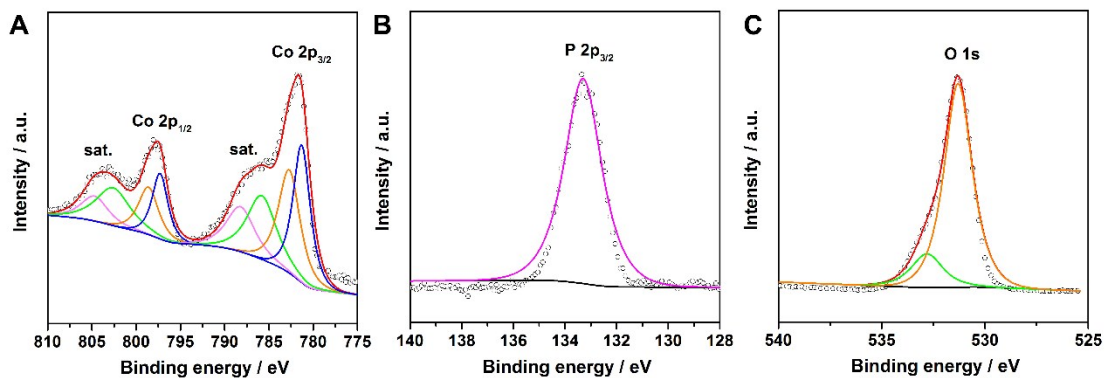

**Fig. S4** XPS spectra of (A) Co, (B) P and (C) O in Co-Pi-8W.

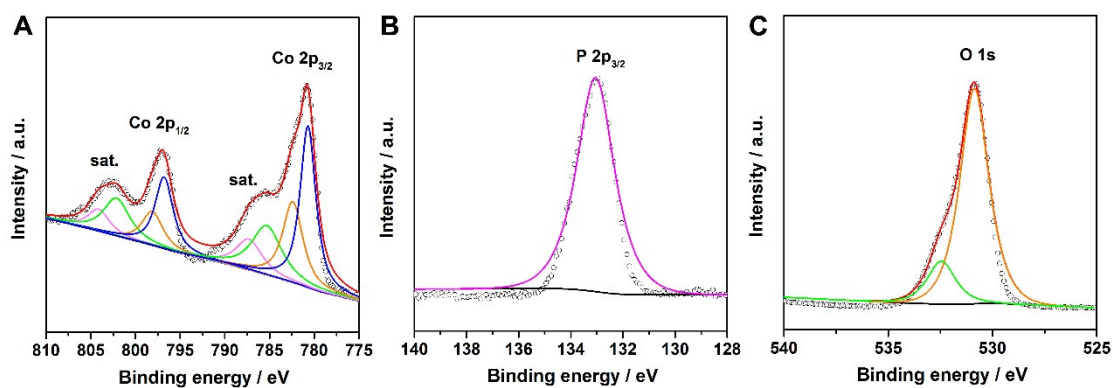

**Fig. S5** XPS spectra of (A) Co, (B) P and (C) O in Co-Pi-2W.

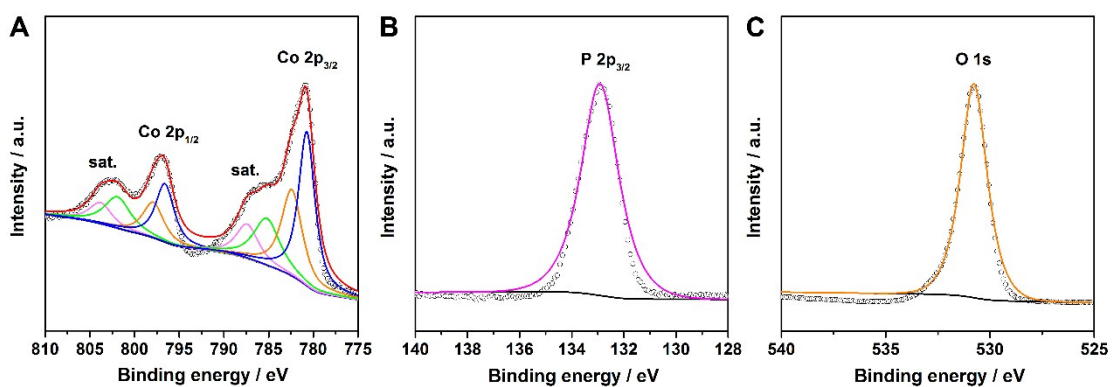

**Fig. S6** XPS spectra of (A) Co, (B) P and (C) O in anhydrous Co-Pi.

**Table S1** Summary of the binding energies of Co<sup>(II)</sup> and Co<sup>(III)</sup> species for the as-obtained Co-Pi-based catalysts.

|          | BE for Co <sup>(III)</sup> [eV] | BE for Co <sup>(II)</sup> [eV] | Average Co-O bond length [Å] |
|----------|---------------------------------|--------------------------------|------------------------------|
| Co-Pi-8W | 781.2 / 797.3                   | 782.8 / 798.6                  | 2.11                         |
| Co-Pi-4W | 781.5 / 797.5                   | 783.0 / 798.8                  | 1.95                         |
| Co-Pi-2W | 780.7 / 796.8                   | 782.4 / 798.2                  | 2.10                         |
| Co-Pi    | 780.8 / 796.7                   | 782.5 / 798.0                  | 2.05                         |

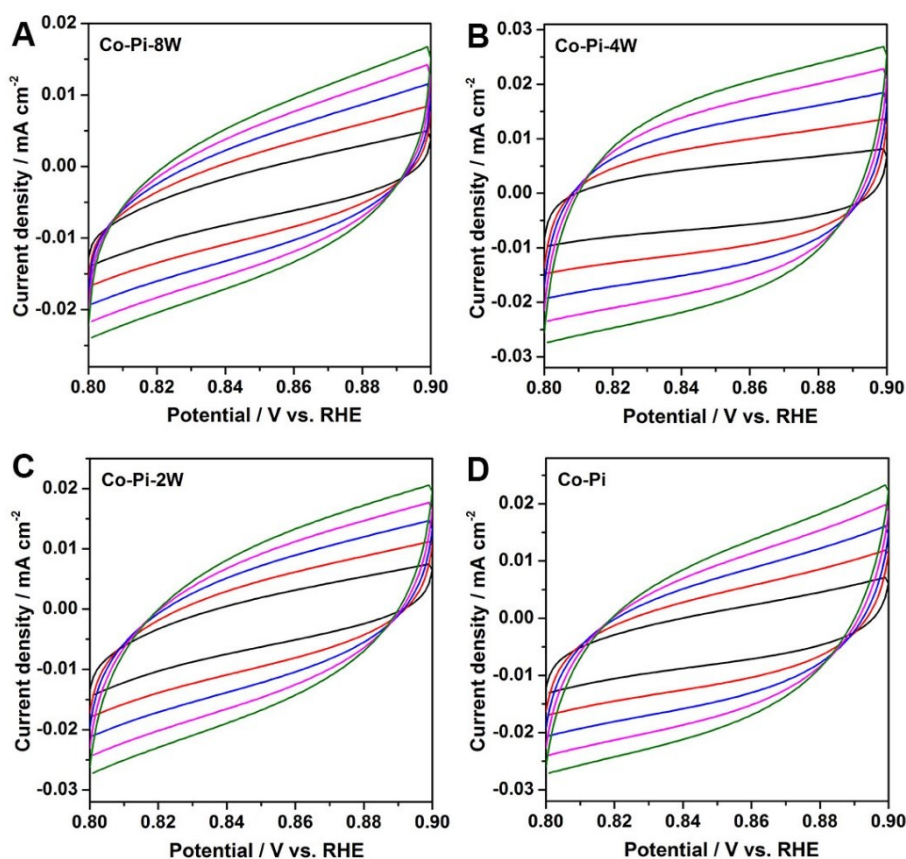

**Fig. S7** CV curves in the non-redox region for the estimation of  $C_{dl}$ .

The estimation of the effective active surface area of the samples was carried out according to literature.<sup>3,4</sup> Cyclic voltammetry (CV) were conducted at various scan rates (2, 4, 6, 8, 10  $\text{mV s}^{-1}$ ) in the region of 0.80-0.90 V vs. RHE where no redox reaction occurs, which can be considered as the double-layer capacitive behavior. The electrochemical double-layer capacitance ( $C_{dl}$ ) of various catalysts can be identified from the cyclic voltammograms, which is expected to be linearly proportional to the



electrochemically active surface area. The  $C_{dl}$  value is estimated by plotting the  $\Delta j$  ( $j_a - j_c$ ) at 0.85 V vs. RHE against the scan rate, where the slope is twice  $C_{dl}$ . The calculated  $C_{dl}$  values were listed in Table 1. Of note, Co-Pi-4W possesses the highest  $C_{dl}$  value among the tested samples, or equivalently, the largest ECSA, which could offer more surface sites for electrocatalysis.

## Reference

- [1] F. Lu, M. Zhou, Y. Zhou and X. Zeng, *Small*, **2017**, *13*, 1701931.
- [2] H. Wen, M. Cao, G. Sun, W. Xu, D. Wang, X. Zhang and Changwen Hu, *J. Phys. Chem. C* **2008**, *112*, 15948–15955.
- [3] M. A. Lukowski, A. S. Daniel, F. Meng, A. Forticaux, L. Li and S. Jin, *J. Am. Chem. Soc.* **2013**, *135*, 10274–10277.
- [4] J. Xie, J. Zhang, S. Li, F. Grote, X. Zhang, H. Zhang, R. Wang, Y. Lei, B. Pan and Y. Xie, *J. Am. Chem. Soc.* **2013**, *135*, 17881–17888.
